# 1 **The evolutionary origin of the universal distribution of fitness effect**

2

3 Ayuna Barlukova, Gabriele Pedruzzi, and Igor M. Rouzine\*

4

5 Sorbonne Université, Institute de Biologie Paris-Seine

6 Laboratoire de Biologie Computationnelle et Quantitative, LCQB, F-75004 Paris, France

7

8 \*Correspondence to: [igor.rouzine@sorbonne-universite.fr](mailto:igor.rouzine@sorbonne-universite.fr)

9

## 10 **Abstract**

11 An intriguing fact long defying explanation is the observation of a universal exponential distribution of  
12 beneficial mutations in fitness effect for different microorganisms. Here we use a general and  
13 straightforward analytic model to demonstrate that, regardless of the inherent distribution of mutation  
14 fitness effect across genomic sites, an observed exponential distribution of fitness effects emerges  
15 naturally, as a consequence of the evolutionary process. Using this result, we develop a technique to  
16 measure the mutation fitness effects for specific genomic sites from a single-time sequence set and apply  
17 it to influenza A H1N1 hemagglutinin protein. Our results demonstrate the difference between the  
18 distribution of fitness effects experimentally observed for naturally occurring mutations and the inherent  
19 distribution obtained in directed-mutagenesis experiments. The technique will enable researchers to  
20 measure fitness effects of mutations across the genome from a single DNA sample, which is important  
21 for predicting the evolution of a population.

22

## 23 **Introduction**

24

25 Evolutionary dynamics of a population of nucleic acid sequences is controlled by several acting  
26 forces, including random mutation, natural selection, genetic drift, and linkage decreased by  
27 recombination. Of central interest is the adaptation of an organism to a new environment, which  
28 occurs due to fixation in a population of rare mutations that confer a benefit to the fitness of the  
29 organism (Imhof and Schlotterer 2001; Kassen and Bataillon 2006; Acevedo, et al. 2014; Stern, et

30 al. 2014; Wrenbeck, et al. 2017). The advantage of each favorable mutation is measured by the  
31 relative change it causes in genome fitness (average progeny number). Thus, the knowledge of  
32 fitness effects for different mutations is essential for predicting the evolutionary trajectory of a  
33 population, such as occurs, for example, during the development of resistance of a pathogen to  
34 treatment or the immune response.

35 Recent advancements in theoretical population genetics provide accurate and general  
36 expressions for the speed of adaptation of an asexual population, its genetic diversity, mutation  
37 fixation probability, and phylogenetic properties within the framework of the traveling wave  
38 theory (Tsimring, et al. 1996; Rouzine, et al. 2003; Rouzine and Coffin 2005; Desai and Fisher  
39 2007; Rouzine and Coffin 2007; Brunet, et al. 2008; Rouzine, et al. 2008; Neher, et al. 2010;  
40 Rouzine and Coffin 2010; Hallatschek 2011; Good, et al. 2012; Walczak, et al. 2012; Neher and  
41 Hallatschek 2013). In all these models, the distribution of fitness effects among mutation sites DFE  
42 serves as an important input parameter.

43 The average-over-genome fitness effect of a beneficial mutation in HIV genome was  
44 estimated using genetic samples from HIV infected patients (Rouzine and Coffin 1999). Finding  
45 out the distribution of the fitness effect over sites (DFE) over genomic sites in several viruses and  
46 bacteria required specially designed and rather elaborate experiments (Imhof and Schlotterer  
47 2001; Kassen and Bataillon 2006; Acevedo, et al. 2014; Stern, et al. 2014; Wrenbeck, et al. 2017).  
48 Recently, selection coefficients across the sites of the hemagglutinin gene of human influenza  
49 A/H3N2 were estimated by fitting the deterministic one-locus model and its approximate  
50 extension for two-loci (Illingworth and Mustonen 2012). The authors fit the model to time-series  
51 data on allele frequencies of hemagglutinin (HA) gene of human influenza A H3N2. (Keightley and  
52 Eyre-Walker 2007) proposed a method of DFE estimation in mutation-selection-drift equilibrium  
53 based on the assumption that DFE has the shape of the gamma distribution. They estimate  
54 parameters of gamma distribution from maximization of the likelihood under the assumption that  
55 the derived sites are binomially distributed. Thus, the two modeling papers used strong  
56 assumptions about the dynamics of the system.

57

(Eyre-Walker and Keightley 2007) reviewed different types of experiments to estimate

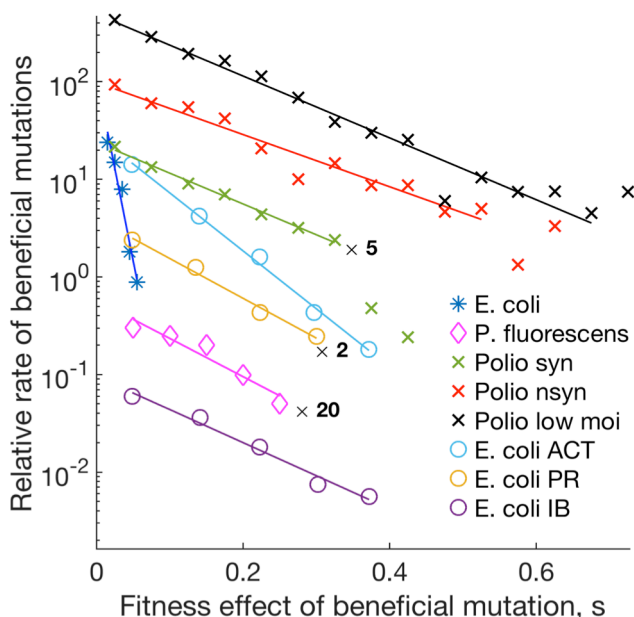

**Fig. 1: Different studies on distribution of fitness effects of beneficial mutations demonstrate an exponential form.** Y-axis: Frequency of beneficial alleles (arbitrary units). X-axis: Mutation gain in fitness due to a beneficial mutation (selection coefficient). Symbols represent results obtained for different sites of the genome in experiments on *Escherichia coli* (Imhof and Schlotterer 2001), *Pseudomonas fluorescens* (Kassen and Bataillon 2006), poliovirus synonymous mutations, poliovirus non-synonymous mutations (Acevedo, et al. 2014), poliovirus low MOI (Stern, et al. 2014), *E. coli* acetamide (ACT), propionamide (PR), and isobutyramide (IB) (Wrenbeck, et al. 2017).

58 DFE. They noted that there is a lack of understanding in DFE. In particular, during evolution, DFE is likely to change in time, which is not in agreement with the assumption of Gillespie-Orr theory of constant DFE (Gillespie 1982; Orr 2003).

To fill this gap of knowledge, we use a different approach based on mechanistic description. We study the dynamics of a system in the state of adaptation (non-equilibrium). Based on our results, we propose a more general method of measuring selection coefficients for specific sites not restricted to the one-site model approximation. In fact, this approximation usually does not work for highly diverse and rapidly changing RNA viruses. The reason is linkage of many evolving loci causing clonal interference and genetic hitchhiking effects complicated by stochastic effects in finite population. Linkage effects greatly modify the

79 speed of evolution and other parameters. Our method takes these effects into consideration  
80 automatically by taking advantage of the prediction of a narrow solitary wave in fitness space  
81 (Rouzine, et al. 2003; Rouzine and Coffin 2005, 2010; Good, et al. 2012).

82 The key to the method is revealed by the intriguing fact long defying explanation: the  
83 frequent occurrence of a universal form of DFE of beneficial mutations. Previous studies in *E. coli*,  
84 *Pseudomonas aeruginosa*, *Pseudomonas fluorescens*, poliovirus show that the rate of beneficial  
85 mutation often decreases with their fitness effect exponentially (Fig. 1) (Imhof and Schlotterer  
86 2001; Kassen and Bataillon 2006; Acevedo, et al. 2014; Stern, et al. 2014; Wrenbeck, et al. 2017).

87 In the present work, we offer a simple interpretation of this phenomenon. We demonstrate  
88 that, regardless of the initial distribution of fitness effects across genomic sites, an exponential  
89 DFE emerges naturally, as a consequence of an evolutionary process. Further, we apply these  
90 findings to a nucleic acid sequence set of HA protein of influenza virus A strain H1N1 to obtain the  
91 relative value of the selection coefficient for each variable, non-synonymous site in the protein.

92 Studying the existing literature on DFE, we found out that two different distributions,  
93 which are described below, were both referred as DFE. We note that there is an inherent constant  
94 distribution of selection coefficients of a genome, which represents the number of genome sites in  
95 the given small interval of the values of selection coefficient. This distribution can be measured  
96 directly only by a site-directed mutagenesis experiment. We will refer to the first as "intrinsic  
97 DFE" to emphasize the fact that it is the property of the pathogen/environment and does not  
98 depend on the state of population. Another distribution is the distribution of new beneficial  
99 mutations arising naturally, which depends on the state of adapting population. In our work, we  
100 will use term "DFE" to denote the second distribution, which is the relative rate of mutations  
101 naturally occurring during experimental evolution (see results shown in Fig. 1). We show, in our  
102 work, by mathematical analysis of a simple and general population model and by direct  
103 comparison with data on influenza A, that these two distributions turn out to be quite different  
104 from each other. We will focus on beneficial mutations.

105

## 106 **Results**

107 In order to explain the exponential shape of DFE observed in the experiments, we start by  
108 noting that beneficial mutations can emerge only at the sites currently occupied with less-fit  
109 alleles. Here we assume bi-allelic approximation, when two alleles are considered: the best-fit and  
110 the next less-fit. Although each position, in principle, can have four nucleotides A, C, T, G, in real  
111 viral data, on moderate time scales 1-10,000 generations, most variable sites display only two  
112 alleles in a sample. In this case, if a genomic site is occupied by the less-fit allele, it can become  
113 only the best-fit by mutation, and, vice versa, a genomic site occupied by the best-fit allele, it can  
114 only lose in fitness. If a population is well adapted during the process of evolution, most of genome  
115 sites, in each genome, already carry best-fit alleles and cannot experience beneficial mutations.

116 Therefore, the observed DFE will be affected by the occupation number distribution of less-fit  
117 alleles among sites with different  $s$ , i.e., by the state of population.

118 Let denote the average frequency of less-fit alleles at a site with fitness effect  $s$  by  $f(s)$ . We  
119 note that  $f(s)$  can also be viewed as the frequency of sites available for beneficial mutations. For  
120 example, consider a sequence of the form 1000001, where 1 stands for the less-fit allele and 0 for  
121 the best-fit allele. Then, only the first and the last positions in the sequence are the sites, where a  
122 beneficial mutation can occur,  $1 \rightarrow 0$ . Thus, the rate of beneficial mutation at any fixed position of  
123 the genome must be proportional to the frequency of less-fit allele  $f$  at this position. If the system  
124 is fully adapted, we have  $f=0$ , and no beneficial mutations are possible.

125 **Experiment description.** The experiments, shown in Fig 1, consider naturally occurring  
126 evolution and count beneficial and deleterious mutations emerging in an adapting population. The  
127 authors evolve a population of bacteria or virus for a short time in culture. Newly emerging  
128 beneficial mutations result in spontaneous increase in the best-fit allele frequency in time  
129 (selection sweeps). Although exact protocols differ, the count occurs for naturally occurring  
130 mutations, not for random mutagenesis. In one experiment (Acevedo, et al. 2014), an  
131 experimentalist uses a deep sequencing technique CirSeq to monitor the arising frequency of  
132 minority alleles at each genomic site as a function of time and fits it with a simple one-site  
133 evolution model expression to estimate  $s$  for each site. In another, the experimentalist is focused  
134 on beneficial mutations in *E.Coli*. (Imhof and Schlotterer 2001), he measures selection coefficient  $s$   
135 for each selection sweep from time series, and then count the number of sweeps at sites belonging  
136 to an interval of the selection coefficient ( $X$ -axis in Fig. 1). Therefore, all these experiments  
137 measure the naturally occurring mutation density, DFE, and not intrinsic DFE.

138 In the last experiment, a beneficial mutation event occurs spontaneously, with a small  
139 probability, at a rare less-fit site. If it survives random drift, it gets fixed in the population. We can  
140 present the results of these experiments on beneficial mutations ( $Y$  axis, Fig 1) as the product  
141  $DFE(s)\pi(s)$ , where the observed DFE is given by

142

143

144

$$DFE(s) = f(s)g(s), \quad (1)$$

145  $f(s)$  is the frequency of target sites available for beneficial mutations,  $\pi(s)$  is fixation probability  
146 of beneficial mutation  $s$ , and  $g(s)ds$  is the number of sites with the selection coefficient in interval  
147  $[s, s+ds]$ . Therefore, we conclude that the raw distribution of selection coefficient across different  
148 sites, intrinsic DFE  $g(s)$ , is not the same as the observable distribution  $DFE(s)$ , given by Eq. 1. The  
149 first distribution is a property of the virus and the cell type and is fixed. The  $DFE(s)$  observed in  
150 the experiments (Fig. 1) depends on the state of the population and evolves in time, since  $f(s)$   
151 evolves in time, which explains the aforementioned observation in (Eyre-Walker and Keightley  
152 2007).  $DFE(s)$  given by Eq. 1 serves as the input density parameter for the models of evolution  
153 (Good, et al. 2012).

154 Below mutant frequency  $f(s)$  is assumed to have pre-evolved before the experiment for a  
155 long time, reflecting pre-history of the population under similar conditions, but is not in mutation-  
156 selection drift equilibrium yet, i.e., it is not best adapted yet to the conditions of the experiment.  
157 We will describe this pre-evolution of  $f(s)$  by simulations and analytically. After predicting the  
158 form of  $f(s)$ , we will use it to estimate intrinsic distribution of  $g(s)$  from data. We will show that  
159  $f(s)$  depends sharply (exponentially) on  $s$ , while both experimental dependence  $g(s)$  and fixation  
160 probability  $\pi(s)$  depend on  $s$  relatively weakly. Therefore, the exponential dependence in mutant  
161 frequency  $f(s)$  dominates experimentally measured  $DFE(s)$  (see Eq. 1), which explains the results  
162 shown in Fig. 1.

163

164 **Model.** We consider an asexual organism, which evolved for some time but is still far from the  
165 mutation-selection equilibrium before the experiment. A haploid population has  $N$  binary  
166 sequences, where each genome site (nucleotide position) numbered by  $i=1, 2, \dots, L$  carries one of  
167 two possible genetic variants (alleles), denoted  $K_i=0$  or  $K_i=1$ . Each site (nucleotide position) has  
168 one of two alleles: the better-fit (for example, A), or the less-fit (for example, G). We note that  
169 beneficial mutations are rare, which is why it unlikely that two occur at the same nucleotide. We  
170 focus here on the short-term adaptation to a new constant environment, where the bi-allelic  
171 model is a fair approximation.

172 The genome is assumed to be very long,  $L \gg 1$ . Time is discrete and measured in units of  
173 population generations. The evolution of the population is described by a standard Wright-Fisher  
174 model, which includes the factors of random mutation with genomic rate  $\mu L$ , natural selection, and

175 random genetic drift. Recombination is assumed to be absent. Once per generation, each  
176 individual genome is replaced by a random number of its progeny which obeys multinomial  
177 distribution. The total population stays constant with the use of the broken-stick algorithm. To  
178 include natural selection, the average progeny number (Darwinian fitness) of sequence  $K_i$  is set  
179 to  $e^W$ . We consider the simplest case when the fitness effects of mutations,  $s_i$ , are additive over  
180 sites:

181

182

$$W = \sum_{i=1}^L s_i K_i$$

183

184 The reference genome,  $\{K_i=0\}$ , can be chosen in arbitrary way. For our aim, it is convenient to set it  
185 to be the same as the best fit sequence, so that all selection coefficients  $s_i$  are negative. Each site  $i$   
186 with deleterious allele,  $K_i=1$ , is a target site for a possible beneficial mutation. Vice versa, a site  
187 with the favorable allele,  $K_i=0$ , can have a deleterious mutation. A more general version of fitness  
188 model that accounts for pairwise epistatic interactions is considered in (Pedruzzi, et al. 2018) and,  
189 for macroscopic epistasis, in (Good and Desai 2015). Here we focus on additive contributions of  
190 single sites to the fitness landscape. We note that most sites usually do not have epistatic partners,  
191 so the approximation is fair.

192 The fitness cost of a deleterious allele  $s$  is distributed in a complex way among genomic  
193 sites. In general, the inherent distribution  $g(s)$  is unknown and depends on a virus, host cell type,  
194 and a protein. Its measurement requires an experiment with site-directed mutagenesis along the  
195 entire genome. The genome has to be mutated artificially, site by site, and then the value of  $s$  is  
196 measured for each mutation. Below we make no assumptions regarding  $g(s)$  and demonstrate  
197 that the exponential shape in the less-fit allele frequency  $f(s)$  arises automatically and  
198 independently on the form of  $g(s)$ . Later on, we will show how  $g(s)$  can be calculated from  
199 sequence data for the influenza virus and demonstrate that it is an unremarkably slow function  
200 within an interval of  $s$ .



201 Our work applies only far from mutation selection equilibrium when system is still  
 202 adapting. It is well known that, in equilibrium, the dependence  $f(s)$  is not exponential, but close to

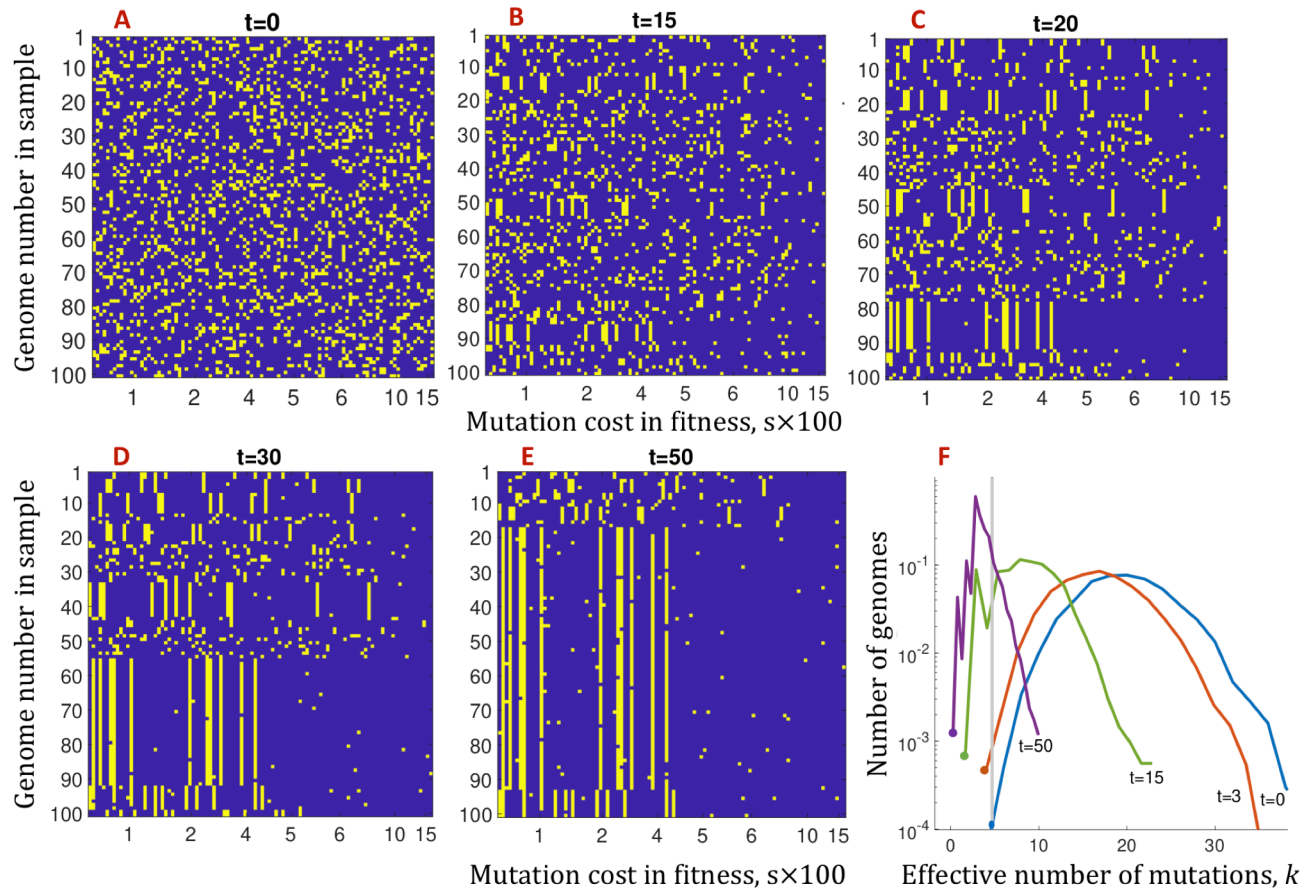

**Fig. 2: Deleterious alleles with higher values of fitness cost,  $s$ , are the first to be depleted during the process of adaptation.** In other words, beneficial mutations with higher  $s$  are fixed first. (a-e) Evolution of a sample of  $10^2$  sequences. Violet dots: better-fit alleles, yellow dots: less-fit alleles. X-axis: the cost in fitness,  $s$ , multiplied by 100. The values of  $s$  are randomly distributed with the half-Gaussian distribution,  $s > 0$ , with the average  $s_{av} = 0.05$ . Genomic sites are ordered by the value of  $s$ . Y-axis: genome number in the sample. The initial population is randomized with the average frequency of deleterious alleles  $f_{in} = 0.2$ . Time points in generations are shown. (f) Evolution of the genome distribution in fitness. X-axis: the effective number of deleterious alleles, defined as  $k = -W/s_{av}$ , where  $W$  is fitness. Different colors show discrete time intervals from 0 to 5. Vertical grey line shows the best fitness class of genomes at  $t=0$ . The emergence of clonal structure in (a-e) coincides with the transition from the selection of pre-existing sequences to the traveling wave regime. Parameters:  $f_{in} = 0.2$ ,  $N = 10^4$ ,  $L = 100$ ,  $s_{av} = 0.05$ ,  $\mu L = 0.05$ .

203  $f = \mu/s$ . For example, computer simulations in [Keightly NRG] show that the DFE evolves away  
 204 from an exponential distribution when approaching equilibrium.

205



206

207 **Monte-Carlo simulation.** We start from an initial population of  $N$  genomes that has a fraction of  
208 deleterious alleles randomly distributed among genomic sites (Fig 2a). Evolution of a sample of  
209 hundred sequences in a representative Monte-Carlo run is shown in Fig. 2. For the sake of visual  
210 convenience, we have re-ordered genomic sites in the ascending order of the value of selection  
211 coefficient  $s_i$ .

212 In the process of evolution, we observe increasing redistribution of deleterious alleles  
213 among genomic sites as follows (Fig. 2). The sites with a relatively high mutation cost loose  
214 deleterious alleles due to natural selection. The asymmetry becomes evident from  $t = 20$ . Finally,  
215 at  $t = 50$  (Fig 2e), mutations on the right side are almost absent. Thus, deleterious alleles with  
216 higher values of mutation cost vanish earlier, which represents a qualitative explanation of the  
217 observed exponential dependence of DFE on  $s$  (Fig 1).

218 We note that in our example, we set a rather large value of initial  $f$ , which is convenient for  
219 numerical computations. In real life, mutant frequency  $f$  may be much smaller than the value we  
220 choose. However, our results do not depend on this initial condition assumption. Later, we provide  
221 our analytic derivation which is general and applies to very low  $f$ , as long as they are not in  
222 mutation selection equilibrium.

223 In addition to the observed re-distribution of less fit alleles, we also observe the  
224 emergence of group of identical sequences, which we explain by evolutionary process as follows.  
225 In Fig 2, two intervals of adaptation can be discerned. Early on, new mutations can be neglected,  
226 and the critical evolutionary factor is the natural selection of pre-existing genomes (Fig 2a, b). It  
227 was previously revealed by a combination of modeling and experimental evolution of vesicular  
228 stomatitis virus (Dutta, et al. 2008). In time interval,  $t \ll 1/s_{av}$ , where  $s_{av}$  is the average of  $g(s)$ , the  
229 distribution of alleles over genomes remains random.

230 In contrast, in the second time interval, which starts around  $t \sim 1/s_{av}$ , new beneficial  
231 mutations become crucial for further evolution, because they give birth to new highest-fit  
232 genomes (Fig 2b-e). To explain the formation and subsequent growth of groups of identical  
233 sequences (Fig 2b-e), we address to traveling wave theory of evolution (Fig 2f).

234 Formation of these clones occurs at the edge of the traveling wave of fitness distribution  
235 (Rouzine, et al. 2003; Desai and Fisher 2007; Hallatschek 2011; Good, et al. 2012) (Fig 2f). The  
236 fitness distribution moves in time towards higher values of fitness, i.e., smaller numbers of

237 deleterious alleles. At early times, the distribution is broad and symmetric. In this regime, as was  
238 mentioned earlier, the main force is the selection of preexisting genomes. After a while ( $t \sim 1/s_{av}$ ),  
239 the profile becomes asymmetric, and the high-fitness edge starts to move to the left together with  
240 the peak due to new beneficial mutations (Fig 2f). The genomes, appearing on the left side from  
241 the initial high-fitness edge (grey line in Fig 2f) share the initial genetic background. Hence, they  
242 produce observed groups of sequences identical at most sites (yellow vertical lines, Fig 2b). As the  
243 wave progresses, the clonal structure grows, and eventually, most genomes in the population  
244 become an offspring of the same ancestor (Fig 2f).

245

### 246 **Analytic derivation of universal DFE.**

247 *Short times.* As the above simulation shows, the evolution of genomes occurring at short times  $t \ll$   
248  $1/s_{av}$  is mainly due to the selection of preexisting variation and new mutations are not important  
249 (*Methods*). The probability of having a deleterious allele at a site with mutation cost  $s$  at time  $t$  has  
250 the form

251

$$252 \quad f(s, t) = \frac{f_{in}}{(1-f_{in})e^{ts} + f_{in}} \quad (2)$$

253

254 where  $f_{in}$  is the initial mutant frequency. The slope of the distribution of deleterious alleles is  
255 defined as

256

$$257 \quad \beta = -\frac{\partial \log(f)}{\partial s} \quad (3)$$

258

259 We observe that the formula in Eq 2 does not depend on the initial distribution of selection  
 260 coefficients among sites,  $g(s)$ . At a small initial mutant frequency  $f_{in}$ , the formula can be

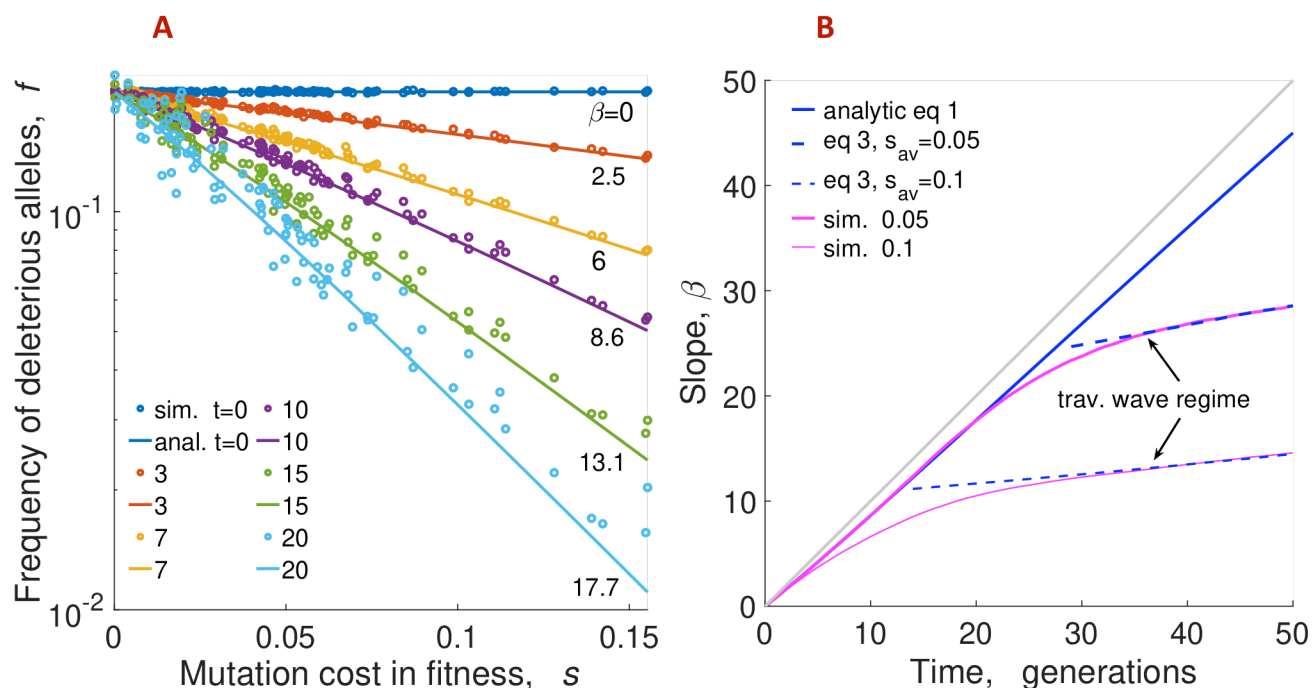

**Fig. 3: The frequency of deleterious alleles decays exponentially with their fitness effect, with the slope increasing in time.** (A) Analytic prediction (Eqs. 1) for the frequency of deleterious alleles agrees with Monte-Carlo simulation. X-axis: Mutation cost of deleterious allele at a genomic site,  $s$ . Y-axis: Frequency of deleterious alleles at such a site,  $f(s)$ . The mutant frequency  $f$  is averaged over 20 random simulation runs. Different colors show different times, symbols are simulation, and lines are analytic prediction (Eq. 1). The numbers on the curves are the values of the slope. Parameters as in Fig 2. (B) The slope of the distribution of deleterious alleles  $\beta$ , analytic (blue lines) and simulation (purple lines), as a function of time,  $t$ . Parameters  $f_{in}$  and  $s_{av}$  different from those in Fig 2 are shown on the legend. The log-slope for the simulated curves of mutant frequency in (A) is obtained by an exponential fit. We observe that the deviation of the simulated slope from the analytic prediction Eq. 1 at long times coincides with the establishment of the traveling regime, which occurs later for smaller  $s_{av}$  (Fig. 2f). At long times, the traveling wave prediction Eq. 3 applies (dashed blue lines). Grey diagonal shows  $\beta(t) = t$ .

261 approximated with an exponential,  $f(s, t) \approx \exp(-ts)$ . The exponential slope is approximately  
 262 equal to time,  $\beta = t$  (see Fig. 3). This is an early regime where the evolution of different sites is  
 263 effectively independent.

264 *Long term.* At longer times  $t > 1/s_{av}$ , beneficial mutations become essential, and the above  
 265 approximation does not apply anymore. We need to use the results of the traveling wave theory  
 266 (Rouzine, et al. 2003; Desai and Fisher 2007; Hallatschek 2011; Good, et al. 2012). In the  
 267 stationary regime of traveling wave (Fig 2f), fixation of beneficial alleles is the process that

268 dominates the loss of deleterious alleles. Let  $t_0$  be the characteristic time when the traveling wave  
269 regime starts. In *Supplementary Methods*, we solve a dynamic equation for allelic frequency  $f$  and  
270 obtain

271

$$272 \quad f(s, t) = f_{in} e^{-t_0 s - \mu N \int_{t_0}^t \pi(s) dt} \quad (4)$$

273

274 where  $\pi(s)$  is the probability of fixation of a beneficial mutation with fitness gain  $s$  derived  
275 previously (Good, et al. 2012). By expanding the argument of the exponential in Eq. 4 in  $s$ , the  
276 slope takes the form

277

$$278 \quad \beta(t) = t_0 + \mu N \pi'(0)(t - t_0) \quad (5)$$

279

280 Please note that Eq. 4 for adaptation regime neglects deleterious mutation events and is valid far  
281 from equilibrium.

282 Previously, a more general argument was used to predict the exponential shape of the DFE  
283 (Pedruzzi, et al. 2018). We assumed that mutant frequency  $f(s)$  has evolved for some time before  
284 the experiment measuring DFE, but that the population was not in equilibrium yet, so that  
285 deleterious mutation events (reverse mutations) are negligible. Under these condition, the system  
286 is in quasi equilibrium, where all the variables change slowly adjusting to the slow change of the  
287 average fitness in time. Hence, given the fitness distribution of genomes, the distribution of alleles  
288 over sites and genomes is given by the condition that the entropy is in the maximum. However, the  
289 full equilibrium does not occur until much later on scaled much larger than  $1/\langle s \rangle$ .

290 Further, the fitness distribution is narrow, as follows from traveling wave theory,  $\Delta W \ll W$ .  
291 Therefore, the system entropy is at the conditional maximum  $S$  restricted by the average value of  
292 fitness  $-W$ . From these assumptions, we obtained the probability to have a deleterious allele at a  
293 given site

294

$$295 \quad f = (1 - f)e^{-\beta s} \quad (6)$$

296

297 where  $\beta = \frac{\partial S}{\partial W}$ . Eq. 6 is general, while Eqs. 2 and 4 provide explicit expressions for  $\beta$ .

298 Thus, Eqs. 2 to 4 demonstrate that the exponential dependence  $f(s)$  arises in the course of  
299 evolution at any initial conditions after the evolution time  $t \sim 1/s_{av}$ , and that the resulting  
300 exponential slope is robust to the initial conditions. The pre-factor at the exponential depends on  
301 the time of pre-evolution and  $f_{in}$ . We assume that the system evolved for time longer than the  
302 inverse average  $\langle s_i \rangle$  but is not in equilibrium yet.

303 Later, we propose the procedure of estimation of this pre-factor directly from data.

304

305 **Monte-Carlo simulation confirms theory.** To test our analytic theory, we compare the frequency  
306 of deleterious alleles obtained by analytic prediction (Eq. 2)  $f(s)$  with the results of Monte-Carlo  
307 simulation averaged over 20 random runs at several time points (Fig. 3a). At  $t = 0$ , simulated and  
308 predicted mutant frequencies are constant, since all sites have the same probability of deleterious  
309 allele,  $f_{in}$ . Thus, the slope  $\beta$  is equal to 0 (blue line). At later times, we observe that the slope  
310 increases gradually in time and the frequency of deleterious alleles  $f(s,t)$  depends exponentially on  
311 selection coefficient. Apart from some residual fluctuations, our analytical formula (Eq. 1)  
312 demonstrates excellent agreement with simulation. Since the sites with possible beneficial  
313 mutations with given mutation gain  $s$  are the sites with deleterious alleles with fitness cost  $s$ , we  
314 confirm that distribution of beneficial fitness effects acquires and maintains an exponential shape  
315 in a broad interval of time.

316 Then, we compared the analytic prediction for the log-slope of DFE  $\beta$  (Eq. 2) with  
317 simulation, for different values of the average selection coefficient  $s_{av}$  and initial allelic frequency  
318  $f_{in}$  (Fig. 3b). We observe a good match with the analytic formula that predicts the linear increase  
319 of the slope in time at early times. At longer times,  $t > 1/s_{av}$ , our analysis and simulation deviate  
320 because the time dependence of the simulated slope becomes slower than linear in time. The  
321 results are not very sensitive to initial frequency  $f_{in}$  or variation of other model parameters (Fig.  
322 3b). Note that, in this regime, although the slope increases more slowly than predicted by Eq. 2,  
323 the exponential dependence on mutation cost is conserved. For longer times, the fluctuations  
324 increase with time, which is related to strong stochastic effects in the traveling wave regime.

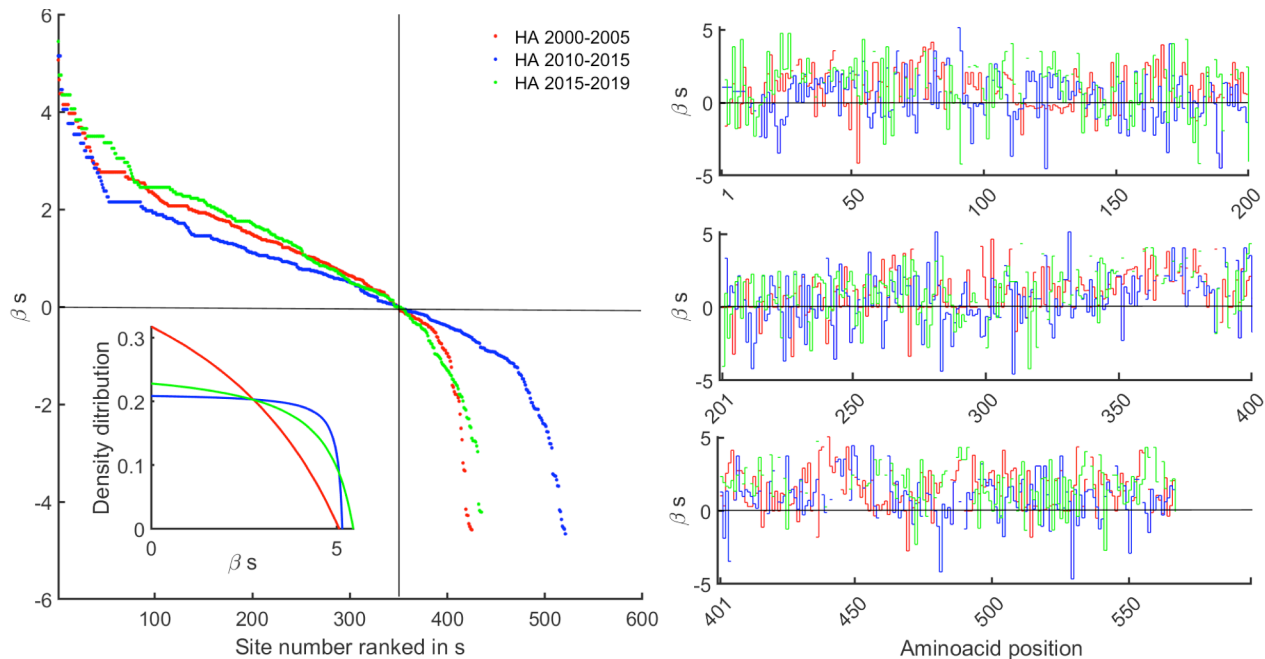

**Fig. 4: The method determines selection coefficients for all genetically diverse sites of influenza H1N1 Hemagglutinin (HA).** (A) The ranked relative values of selection coefficient  $\beta s$  calculated from Eq. 6 for three 5-year windows (shown). Only sufficiently variable sites ( $f > 5\%$ ) are shown. For balanced sampling, sequences with overall mutation frequency  $< 5\%$  were down-weighted by 25% through resampling 25 times (Pedruzzi and Rouzine 2019). (Insert) The normalized distributions of selection coefficients across amino acid positions for  $s > 0$  in the three time windows. (B-D) The values of  $\beta s$  at their actual positions in HA.

325 The differences between the prediction of Eq. 2 and simulation at long times are caused by  
 326 entering the traveling wave regime. In this regime, the wave moves beyond the best-fit sequence  
 327 present in the initial population due to beneficial mutations (Fig 2f). To predict the slope  
 328 analytically, we need to account for the effect of beneficial mutations (Good, et al. 2012). Using the  
 329 analytic result in Eq. 4 derived in *S1 Appendix*, we obtain a good agreement with long-term  
 330 simulation results (Fig. 3). These results were averaged over several independent simulation runs.  
 331 Thus, our model of evolution provides a simple explanation for the long-standing puzzle of the  
 332 exponential DFE (Fig. 1).

333

334 **Calculating selection coefficients from a virus protein sequence set.** Our results have an  
 335 important practical application. They enable us to estimate the relative value of the selection  
 336 coefficient,  $s$ , for each genetically diverse site using a *one-time* sequence set, as long as the system  
 337 is far from steady-state. We focus on one of two surface proteins of Influenza A H1N1,  
 338 Hemagglutinin (HA), which contains targets of neutralizing antibody response and a subject of



339 intense scrutiny. HA sequences were downloaded from a public database  
340 (<https://www.fludb.org>). The sequences were collected worldwide between years 2000 and  
341 2019. We classified them into three 5-year time windows before and after pandemic influenza  
342 (2005-2010), during which replication inhibitors were administered broadly. After binarization of  
343 all sequences into consensus 0 and non-consensus 1, we determined allelic frequency  $f_i$  for each  
344 site  $i$ . Based on our analytic result in Eq. 3, the relative value of the selection coefficients at  
345 aminoacid position  $i$  can be estimated from

346

$$347 \quad \beta(t)s_i = -\log \left[ \frac{f_i(t)}{f_{norm}} \right] \quad (7)$$

348

349 The presence of an additional factor  $f_{norm}$  in Eq. 7 is due to the fact that, in Eq. 7,  $f_i$   
350 represents the frequency of less-fit alleles at site  $i$ , hence,  $s_i > 0$  for all sites, by definition. In real  
351 life, in experiment, the best-fit sequence is not known, or may not even exist, see the discussion of  
352 influenza below. Hence,  $f_i$  has to be redefined as the frequency of minority alleles with respect to  
353 the consensus sequence determines at a fixed (usually initial) time point. Therefore, some sites  
354 will have negative  $s_i$ , and we need to introduce factor  $f_{norm}$  to account for such sites: they  
355 correspond to  $f_i > f_{norm}$ .

356 Note that the left-hand side in Eq. 7 factorizes into a product of two term: one depends only  
357 on time, and another only on site. We can use this fact to determine the normalization factor  $f_{norm}$ ,  
358 as follows. In each time window, we rank genomic sites in the descending order in  $-\log f$ . We  
359 observe the intersection between the ranked curves obtained at different times (Fig. 4a). Then, we  
360 add a constant to the ranked  $\log f$  to obtain  $s = 0$  at the intersection point between the curves. The  
361 resulting estimate of  $\beta(t)s_i$  from Eq. 7 represents the selection coefficient at site  $i$  in relative  
362 units. Further, taking the inverse derivative from each ranked  $s$  curve, we obtain the distribution  
363 density of selection coefficient over non-conserved sites  $g(s)$ , which is broad and becomes almost  
364 uniform after the pandemic of 2005-2010 (inset in Fig. 4a). Finally, we can re-order the ranked  
365 sites back and plot the relative values of selection coefficient,  $\beta s$ , against their aminoacid  
366 positions (Fig 4 b-d).

367

368

## 369 Discussion

370

371 In summary, we proposed an evolutionary explanation for the exponential DFE of beneficial  
372 mutations in terms of the mutation gain in fitness. Using an asexual population model, we  
373 predicted a gradual depletion of deleterious alleles with higher fitness costs accompanied by the  
374 emergence of a clonal structure after  $t \approx 1/s_{av}$ . First, neglecting new mutations, we obtained an  
375 exponential dependence of allelic frequency on fitness. The logarithmic slope is equal to time,  
376 which corresponds to the virtual absence of linkage effects at early times. The formula is in  
377 agreement with Monte-Carlo simulations for early times until  $t \approx 1/s_{av}$ . At longer times, when  
378 beneficial mutations become crucial for the generation of new highly fit genomes, we obtained  
379 another expression based on the traveling wave theory. Our results confirm the previous work  
380 (Pedruzzi, et al. 2018) where an exponential dependence for deleterious allele frequency was  
381 predicted using a rather general argument based on the maximum of entropy. This work confirms  
382 this result and, moreover, calculates a specific logarithmic slope for the exponential.

383 Based on the experiments cited in *Introduction*, many models assume an exponential  
384 distribution of fitness effects as a starting assumption (Gerrish and Lenski 1998; Good, et al. 2012;  
385 Walczak, et al. 2012). Our findings provide an evolutionary justification for this assumption and  
386 update these theories by predicting that the distribution is not constant but shrinks in time.  
387 However, when mutation selection balance is approached, reverse mutations demolish selection  
388 as well as exponential dependence in DFE.

389 Other groups attempted to explain the universality of the exponential DFE using formal  
390 statistical arguments, such as the extreme-value theory (Gillespie 1982; Orr 2003; Joyce, et al.  
391 2008). There are essential differences between this pioneering work and our findings. In the cited  
392 work, the aim was to prove an exponential distribution for the raw distribution of selection  
393 coefficient among all possible genomic sites,  $g(s)$ , in the limit of large  $s$ .

394 In contrast, we take into account our conclusion that the exponential dependence of DFE on  
395 selection coefficient is mostly determined by the evolved occupation numbers of sites  $f(s, t)$  in the  
396 broad range of  $s$  and that  $g(s)$  is a relative slow function of  $s$ . Also, the cited approach (Gillespie  
397 1982; Orr 2003; Joyce, et al. 2008) predicts a constant slope of the exponential, while our analysis,  
398 simulation, and experimental data prove that it changes in time.

399 Applying our theory to influenza A virus sequence data, we estimated selection coefficients  
400 for each diverse site of hemagglutinin in a broad time range. Note that predicted  $s_i$  depend on a  
401 time interval (Fig 4b-d). The time dependence is expected, because the evolution of influenza  
402 occurs under time-dependent selection conditions created by accumulating memory cells in  
403 recovered individuals (Rouzine and Rozhnova 2018). The sharp change in the shape of  
404 distribution of  $g(s)$  (Fig. 4a inset), as well as the drop in the exponential slope before and after  
405 pandemic (Fig 4a), may be related to epistatic effects caused by rapid development of virus  
406 resistance to antiviral treatment used during pandemics of 2005-2010 (Pedruzzi and Rouzine  
407 2019). Analogously, it has been argued that the high level of HIV diversity in chronically infected  
408 patients is caused by adaptation to the individual immune response, including escape mutations in  
409 20-30 epitopes and numerous epistatic sites per each escape mutation (Rouzine and Coffin 1999).

410 To conclude, we demonstrated that the exponential DFE observed in viruses and bacteria is  
411 a natural consequence of the process of adaptation. We derived analytical expressions for the log-  
412 slope of exponential distribution in a broad range of times and parameter values. We showed how  
413 these theoretical findings can be used to measure the Darwinian fitness effect of mutations, in  
414 relative units, from a single protein sequence sample.

415

## 416 **Materials and Methods**

417 See online Supplement

418

419 **Funding:** This work has been supported by Agence Nationale de la Recherche grant J16R389 to  
420 I.M.R.

421

## 422 **Author contributions:**

423 A.B.: Formal analysis, Investigation, Software, Visualization, Writing-original draft

424 G.P.: Data curation, Software, Visualization

425 I.M.R.: Conceptualization, Formal analysis, Methodology, Project administration, Supervision,  
426 Writing-review & editing

427

428 **Competing interests:** Authors declare no competing interests.

429

430 **Data and materials availability:** All data are from public database <https://www.fludb.org>.

431

432 **Supplementary Materials:** Materials and Methods

433

434

435

## 436 **References**

437

438

439

440 Acevedo A, Brodsky L, Andino R. 2014. Mutational and fitness landscapes of an RNA virus revealed  
441 through population sequencing. *Nature* 505:686-690.

442 Brunet E, Rouzine IM, Wilke CO. 2008. The stochastic edge in adaptive evolution. *Genetics*  
443 179:603-620.

444 Desai MM, Fisher DS. 2007. Beneficial mutation selection balance and the effect of linkage on  
445 positive selection. *Genetics* 176:1759-1798.

446 Dutta RN, Rouzine IM, Smith SD, Wilke CO, Novella IS. 2008. Rapid adaptive amplification of  
447 preexisting variation in an RNA virus. *J Virol* 82:4354-4362.

448 Eyre-Walker A, Keightley PD. 2007. The distribution of fitness effects of new mutations. *Nat Rev*  
449 *Genet* 8:610-618.

450 Gerrish PJ, Lenski RE. 1998. The fate of competing beneficial mutations in an asexual population.  
451 *Genetica* 102-103:127-144.

452 Gillespie JH. 1982. A Randomized Sas Cff Model of Natural-Selection in a Random Environment.  
453 *Theoretical Population Biology* 21:219-237.

454 Good BH, Desai MM. 2015. The impact of macroscopic epistasis on long-term evolutionary  
455 dynamics. *Genetics* 199:177-190.

456 Good BH, Rouzine IM, Balick DJ, Hallatschek O, Desai MM. 2012. Distribution of fixed beneficial  
457 mutations and the rate of adaptation in asexual populations. *Proc Natl Acad Sci U S A* 109:4950-  
458 4955.

459 Hallatschek O. 2011. The noisy edge of traveling waves. *Proc Natl Acad Sci U S A* 108:1783-1787.

460 Illingworth CJ, Mustonen V. 2012. Components of selection in the evolution of the influenza virus:  
461 linkage effects beat inherent selection. *PLoS Pathog* 8:e1003091.

462 Imhof M, Schlotterer C. 2001. Fitness effects of advantageous mutations in evolving *Escherichia*  
463 *coli* populations. *Proc Natl Acad Sci U S A* 98:1113-1117.

464 Joyce P, Rokyta DR, Beisel CJ, Orr HA. 2008. A general extreme value theory model for the  
465 adaptation of DNA sequences under strong selection and weak mutation. *Genetics* 180:1627-1643.

466 Kassen R, Bataillon T. 2006. Distribution of fitness effects among beneficial mutations before  
467 selection in experimental populations of bacteria. *Nat Genet* 38:484-488.

- 468 Keightley PD, Eyre-Walker A. 2007. Joint inference of the distribution of fitness effects of  
469 deleterious mutations and population demography based on nucleotide polymorphism  
470 frequencies. *Genetics* 177:2251-2261.
- 471 Neher RA, Hallatschek O. 2013. Genealogies of rapidly adapting populations. *Proc Natl Acad Sci U S*  
472 *A* 110:437-442.
- 473 Neher RA, Shraiman BI, Fisher DS. 2010. Rate of adaptation in large sexual populations. *Genetics*  
474 184:467-481.
- 475 Orr HA. 2003. The distribution of fitness effects among beneficial mutations. *Genetics* 163:1519-  
476 1526.
- 477 Pedruzzi G, Barlukova A, Rouzine IM. 2018. Evolutionary footprint of epistasis. *PLoS Comput Biol*  
478 14:e1006426.
- 479 Pedruzzi G, Rouzine IM. 2019. High-fidelity analysis of epistasis predicts primary and secondary  
480 drug resistant mutations in influenza. , submitted for publication.
- 481 Rouzine IM, Brunet E, Wilke CO. 2008. The traveling-wave approach to asexual evolution: Muller's  
482 ratchet and speed of adaptation. *Theoretical Population Biology* 73:24-46.
- 483 Rouzine IM, Coffin JM. 2005. Evolution of human immunodeficiency virus under selection and  
484 weak recombination. *Genetics* 170:7-18.
- 485 Rouzine IM, Coffin JM. 2007. Highly fit ancestors of a partly sexual haploid population. *Theoretical*  
486 *Population Biology* 71:239-250.
- 487 Rouzine IM, Coffin JM. 2010. Multi-site adaptation in the presence of infrequent recombination.  
488 *Theoretical Population Biology* 77:189-204.
- 489 Rouzine IM, Coffin JM. 1999. Search for the mechanism of genetic variation in the pro gene of  
490 human immunodeficiency virus. *J Virol* 73:8167-8178.
- 491 Rouzine IM, Rozhnova G. 2018. Antigenic evolution of viruses in host populations. *PLoS Pathog*  
492 14:e1007291.
- 493 Rouzine IM, Wakeley J, Coffin JM. 2003. The solitary wave of asexual evolution. *Proc Natl Acad Sci*  
494 *U S A* 100:587-592.
- 495 Stern A, Bianco S, Yeh MT, Wright C, Butcher K, Tang C, Nielsen R, Andino R. 2014. Costs and  
496 benefits of mutational robustness in RNA viruses. *Cell Rep* 8:1026-1036.
- 497 Tsimring LS, Levine H, Kessler D. 1996. RNA virus evolution via a fitness-space model. *Phys. Rev.*  
498 *Lett.* 76:4440-4443.
- 499 Walczak AM, Nicolaisen LE, Plotkin JB, Desai MM. 2012. The structure of genealogies in the  
500 presence of purifying selection: a fitness-class coalescent. *Genetics* 190:753-779.
- 501 Wrenbeck EE, Azouz LR, Whitehead TA. 2017. Single-mutation fitness landscapes for an enzyme  
502 on multiple substrates reveal specificity is globally encoded. *Nat Commun* 8:15695.
- 503

## Supplementary Methods

### The evolutionary origin of the universal mutation spectrum

A. Barlukova , G. Pedruzzi, and I. M. Rouzine\*

*Sorbonne Université, Institute de Biologie Paris-Seine, Laboratoire de Biologie  
Computationnelle et Quantitative, LCQB, F-75004 Paris, France*

\*To whom correspondence should be addressed:

[igor.rouzine@sorbonne-universite.fr](mailto:igor.rouzine@sorbonne-universite.fr)

**Sample balancing.** After alignment and binarization of sequences by setting consensus residues to 0 and non-consensus to 1, we balanced sequence sampling for the reasons described in (1). Specifically, we selected the sequences with frequency of 1s per genome less than a preset value  $dv$  (5%). These were randomly sampled 25 times and down-weighted by a coefficient  $D_w$ , set to 25%. Then, we followed the procedure described in the main text and in the legend to Fig. 5 to predict the distribution of selection coefficients.

**Model.** We consider a haploid population of  $N$  binary sequences, where each genome site (nucleotide position) numbered by  $i=1, 2, \dots, L$  carries one of two possible genetic variants (alleles), denoted  $K_i=0$  or  $K_i=1$ . The genome is assumed to be very long,  $L \gg 1$ . Time is discrete and measured in units of population generations. The evolution of the population is simulated using a standard Wright-Fisher model, which includes the factors of random mutation with genomic rate  $\mu L$ , natural selection, and random genetic drift. Recombination is assumed to be absent. Once per generation, each individual genome is replaced by a random number of its progeny which obeys multinomial distribution. The total population stays constant with the use of the broken-stick algorithm. To include natural selection, the average progeny number (Darwinian fitness) of sequence  $K_i$  is set to  $e^{W}$ . We consider the simplest case when the fitness effects of mutations,  $s_i$ , are additive over sites:

$$W = \sum_{i=1}^L s_i K_i \quad (8)$$

The reference genome,  $\{K_i=0\}$ , can be chosen in arbitrary way. For our aim, it is convenient to set it to be the same as the best fit sequence, so that all selection coefficients  $s_i$  are negative. Each site  $i$  with deleterious allele,  $K_i=1$ , is a target site for a possible beneficial mutation. Vice versa, a site with the favorable allele,  $K_i=0$ , can have a deleterious mutation. A more general version of fitness model that accounts for pairwise epistatic interactions is considered in (2) and, for macroscopic epistasis, in (3). Here we focus on additive contributions of single sites to the fitness landscape.

In our simulations, selection coefficients are chosen randomly at each site from the half-normal distribution



$$g(s) = \frac{2}{s_{av}\pi} \exp\left(-\frac{s^2}{\pi s_{av}^2}\right) \quad (9)$$

Here,  $s_{av}$  is the average mutation cost in fitness for the initial state.

**Early evolution.** We focus on one genomic site of  $L$  sites, whose selection coefficient is assumed to be known and equal to  $-s$ , where  $s > 0$ . The other selection coefficients are assumed to vary following some random distribution with density  $g(s)$ . We make no assumption regarding the shape of  $g(s)$ , but assume that distribution of  $s$  at different sites is independent. We assume also that initial population has random distribution of alleles among sites with average frequency of less fit alleles denoted by  $f_{in}$ . Biologically this condition corresponds to a population that has changed suddenly its conditions. First, we will also neglect the effect of new mutations, which simplification is shown to be accurate at early times, when evolution is dominated by decay of standing variation. In the next subsection, we will include the effect of new mutations. Denote by  $I_0$  the proportion of all possible sequences having 0 (wild-type) at given site. The proportion of possible sequences having 1 (mutation) at the site denote by  $I_1$ . Then, the corresponding mutant frequency can be found as ratio

$$f = \frac{I_1}{I_0 + I_1} \quad (10)$$

To obtain frequency in time we account for the action of selection. Selection causes decay of the number of each sequence  $\{K_i\}$ , by time dependent factor  $e^{-t \sum_{i=1}^{L-1} s_i K_i}$ . Frequencies  $I_0$  and  $I_1$  represent the average over all values of  $s$  and  $K_i$  for all sites

$$I_0 = (1 - f_{in}) \prod_{i=1}^{L-1} \left( \int_0^{+\infty} ds_i e^{-t \sum_{i=1}^{L-1} s_i K_i} \sum_{K_i=0}^1 p(K_i) g(s_i) \right)$$

$$I_1 = f_{in} e^{-ts} \prod_{i=1}^{L-1} \left( \int_0^{+\infty} ds_i e^{-t \sum_{i=1}^{L-1} s_i K_i} \sum_{K_i=0}^1 p(K_i) g(s_i) \right)$$

probabilities of having less-fit and better-fit alleles is  $p(1) = f_{in}$  and  $p(0) = 1 - f_{in}$ , respectively. Then,  $I_0$  and  $I_1$  can be rewritten by taking exponential term inside of parentheses and separating variables at different sites  $i$ . The result takes the form

$$f = \frac{e^{-ts} f_{in}}{1 - f_{in} + e^{-ts} f_{in}} \quad (11)$$

**Traveling wave regime.** In the traveling wave regime, which starts around  $t > 1/s_{av}$ , beneficial mutations have to be included into consideration because they create new best-fit genomes of the traveling wave (4-7). Let  $t_0$  be the characteristic time of the beginning of traveling wave regime and  $\pi(s)$  be the fixation probability

of beneficial mutations. In this regime, most of deleterious alleles are located at uniformly deleterious sites (Fig. 2, yellow columns). Hence, their loss occurs mostly due to fixation of new beneficial alleles at these sites. Then, the dynamic equation for the frequency of deleterious alleles for  $t > t_0$ ,  $t_0 \sim 1/s_{av}$ , can be written as follows

$$\frac{\partial f(s,t)}{\partial t} = -\mu N \pi(s) f(s,t) \quad (12)$$

The initial condition for Eq. 8 can be obtained from the estimate of  $f$  in the initial time interval where selection of pre-existing genomes is the dominant process. From Eq. 7

$$f(s, t_0) \approx f_{in} e^{-t_0 s}$$

The solution of Eq. 8 with these initial conditions is given by Eq. 3 in the Main text. Thus, the problem is reduced to the result of the previous work ( $\beta$ ) for the fixation probability of mutations  $\pi(s)$

$$\pi(s) \sim e^{-\frac{s^2}{2v} \left( \frac{e^{-\frac{x_c}{v}} - 1}{s} \right)} + \frac{e^{-\frac{x_c^2}{2v}}}{vx_c} \int_{x_c}^{\infty} dx x e^{-\frac{(x-s)^2}{2v}}, \quad \pi(0) \approx \frac{1}{N} \quad (13)$$

Here,  $v$  is the rate of adaptation,  $x_c$  is the characteristic value of fitness. Parameters  $v$  and  $x_c$  can be found numerically from two transcendental equations

$$2 = \frac{U_b}{\sigma} \sqrt{\frac{2\pi\sigma^2}{v}} \left[ 1 + \frac{\sigma}{x_c} + \frac{v}{\sigma x_c - v} \right] e^{\frac{(x_c - \frac{v}{\sigma})^2}{2v}} \quad (14)$$

$$1 = NU_b \left[ \frac{x_c^2}{v} - 1 + \frac{2x_c\sigma}{v} + \frac{2\sigma^2}{v} \right] e^{-\frac{1}{\sigma} \left( x_c - \frac{v}{2\sigma} \right)} \quad (15)$$

where  $U_b$  is the probability of beneficial mutation per genome per generation. Thus, the time evolution of the frequency of deleterious alleles can be found numerically using Eqs. 3, 9, 10, 11. We note that parameter  $t_0$  in Eq. 3 is unknown, since Eq. 3 is the asymptotic expression at large times,  $t \gg 1/s_{av}$ . To connect two regimes of evolution we find optimum value of  $t_0$ , such that simulated and analytical curves for the slopes are at the best match. The value of  $\sigma$  is the average effect of beneficial mutation for the sites that can have such a mutation and, hence, is equal to  $1/\beta$ , where  $\beta$  found from self-consistent condition given by Eqs. 2 and 3. Note that Eq. 3 predicts an exponential decay at small to moderate  $s$ ; at large  $s \sim 1$ , it predicts a faster decay with  $s$ .

1. G. Pedruzzi, I. M. Rouzine, High-fidelity analysis of epistasis predicts primary and secondary drug resistant mutations in influenza. , *submitted for publication*, (2019).

2. G. Pedruzzi, A. Barlukova, I. M. Rouzine, Evolutionary footprint of epistasis. *PLoS Comput Biol* **14**, e1006426 (2018).
3. B. H. Good, M. M. Desai, The impact of macroscopic epistasis on long-term evolutionary dynamics. *Genetics* **199**, 177-190 (2015).
4. I. M. Rouzine, J. Wakeley, J. M. Coffin, The solitary wave of asexual evolution. *Proc Natl Acad Sci U S A* **100**, 587-592 (2003).
5. M. M. Desai, D. S. Fisher, Beneficial mutation selection balance and the effect of linkage on positive selection. *Genetics* **176**, 1759-1798 (2007).
6. I. M. Rouzine, J. M. Coffin, Highly fit ancestors of a partly sexual haploid population. *Theor Popul Biol* **71**, 239-250 (2007).
7. R. A. Neher, B. I. Shraiman, D. S. Fisher, Rate of adaptation in large sexual populations. *Genetics* **184**, 467-481 (2010).
8. B. H. Good, I. M. Rouzine, D. J. Balick, O. Hallatschek, M. M. Desai, Distribution of fixed beneficial mutations and the rate of adaptation in asexual populations. *Proc Natl Acad Sci U S A* **109**, 4950-4955 (2012).
